# Supplementary material for: Artificial Intelligence in Medical Diagnosis and Treatment Planning Among Healthcare Professionals in a Tertiary Hospital, in Tanzania
Source: Research Square preprint supplement (doi:10.21203/rs.3.rs-7923452/v1), 2025-11-19
Supplement: Supplementary file 1 [file 9d38d35df736ca9bffcbdaae.docx]

QUESTIONAIRE FORM

**Section 1: Demographic Information**

1. What is your role at Bugando Medical Center (BMC)?

- [ ] Physician

- [ ] Surgeon

- [ ] Nurse

- [ ] Medical Technologist

- [ ] Other (please specify: __________)

2. How many years have you been practicing in your current role?

- [ ] Less than 1 year

- [ ] 1-5 years

- [ ] 6-10 years

- [ ] More than 10 years

3. What is your highest level of education?

- [ ] Bachelor’s degree

- [ ] Master’s degree

- [ ] Doctoral degree

- [ ] Other (please specify: __________)

**Section 2: Knowledge about AI in Medical Diagnosis and Treatment Planning**

4. How familiar are you with the concept of Artificial Intelligence (AI) in healthcare?

- [ ] Very familiar

- [ ] Somewhat familiar

- [ ] Not familiar

5. Please rate your understanding of the applications of AI in medical diagnosis and treatment planning.

- [ ] Excellent

- [ ] Good

- [ ] Fair

- [ ] Poor

6. Have you received formal training on the use of AI in medical practice?

- [ ] Yes

- [ ] No

7. How confident are you in interpreting AI-generated diagnostic recommendations?

- [ ] Very confident

- [ ] Somewhat confident

- [ ] Not confident

8. Which AI technologies have you used or encountered in your medical practice? (Select all that apply)

- [ ] Machine learning algorithms

- [ ] Natural language processing (NLP)

- [ ] Deep learning models

- [ ] Decision support systems

- [ ] Other (please specify: __________)

- [ ] None

**Section 3: Attitudes towards AI in Medical Practice**

9. What is your opinion on the potential benefits of AI in medical diagnosis and treatment planning?

- [ ] Strongly agree

- [ ] Agree

- [ ] Neutral

- [ ] Disagree

- [ ] Strongly disagree

10. How concerned are you about the ethical implications of using AI in medical decision-making?

- [ ] Very concerned

- [ ] Somewhat concerned

- [ ] Neutral

- [ ] Not concerned

11. Do you believe AI can improve patient outcomes in medical practice?

- [ ] Yes, significantly

- [ ] Yes, moderately

- [ ] No, it will not

12. In your opinion, what are the main barriers to adopting AI in medical diagnosis and treatment planning at BMC? (Select all that apply)

- [ ] Lack of technical expertise among staff

- [ ] Concerns about data privacy and security

- [ ] High costs associated with AI implementation

- [ ] Resistance to change among medical professionals

- [ ] Other (please specify: __________)

- [ ] None

**Section 4: Current Practices and Experience with AI**

13. Have you personally used AI technologies in medical diagnosis or treatment planning?

- [ ] Yes

- [ ] No

14. If yes, please describe your experience with AI technologies in medical practice (e.g., specific applications used, outcomes observed).

15. How often do you consult AI-generated recommendations in your clinical practice?

- [ ] Daily

- [ ] Weekly

- [ ] Monthly

- [ ] Rarely/Never

**Section 5: Open-Ended Questions**

16. What do you perceive as the greatest potential benefits of integrating AI into medical diagnosis and treatment planning?

17. What do you see as the main challenges or concerns associated with the use of AI in your medical practice?

18. Please share any additional thoughts or comments you have regarding the use of AI in medical diagnosis and treatment planning at BMC.

**Closing:**

Thank you for participating in this survey. Your responses are valuable for our research. If you would like to receive a summary of the findings, please provide your email address (optional).
